# Supplementary material
Source: MDPI journal article supplement (https://www.mdpi.com/1099-4300/18/3/67)
Supplement: s1 [file s1]

Supplementary Materials: Role of Disulfide Bonds in Stabilizing the Conformation of Selected
Enzymes—An Approach Based on Divergence Entropy Applied to the Structure of Hydrophobic Core in Proteins

Mateusz Banach, Barbara Kalinowska, Leszek Konieczny and Irena Roterman

**Table S1.** *RD* values for domain D1 of 1M6B, its individual secondary folds and all fragments bounded by Cys residues which form SS bonds. *RD* values in excess of 0.5 (indicating divergence from the idealized distribution) are listed in boldface.

| **1M6B-D1** | **Fragment** | ***RD*** | **SS-bonds** |
| --- | --- | --- | --- |
| Domain | 8–198 | **0.610** | - |
| Beta-I | 8–10 | 0.329 | 10C |
| Loop | 11–37 | 0.160 | 37C |
| Beta-I | 38–41 | 0.431 | - |
| **Beta-II** | **44–48** | **0.660** | - |
| Loop | 49–54 | 0.346 | - |
| Helix | 55–61 | 0.438 | - |
| **Beta-II** | **67–72** | **0.893** | - |
| Loop | 73–75 | 0.207 | - |
| Beta-III | 76–80 | 0.430 | - |
| Loop | 81–83 | 0.263 | - |
| Beta-I | 84–87 | 0.455 | - |
| Loop | 88–94 | 0.177 | - |
| **Beta-II** | **95–102** | **0.613** | - |
| Loop | 103–113 | 0.401 | - |
| Beta-III | 114–116 | 0.401 | - |
| Loop | 117–121 | 0.335 | - |
| **Beta-I** | **122–124** | **0.547** | - |
| Beta-II | 127–132 | 0.237 | - |
| Loop | 133–142 | 0.286 | 137C |
| Helix | 143–148 | 0.338 | - |
| **Loop** | **149–153** | **0.543** | - |
| Beta-II | 154–158 | 0.305 | - |
| **Loop** | **159–198** | **0.621** | 164C,167C,171C,175C,183C,191C |
| Beta-sheet | **I** | **0.755** | 10C |
| II | 0.421 | - |
| **III** | **0.539** | - |
| **Helices** | **-** | **0.558** | - |
| SS-bond | 10–37 | No data | - |
| 137–164 | 0.434 | - |
| 167–175 | 0.397 | - |
| 171–183 | 0.455 | - |
| Inter-SS | **37–137** | **0.619** | - |
| 164–167 | 0.374 | - |
| 175–183 | 0.434 | - |
| **183–191** | **0.705** | - |

**Table S2.** *RD* values for domain D2 of 1M6B, its individual secondary folds and all fragments bounded by Cys residues which form SS bonds. *RD* values in excess of 0.5 (indicating divergence from the idealized distribution) are listed in boldface. Right column gives the positions of Cys residues engaged in SS-bonds.

| **1M6B-D2** | **Fragment** | ***RD*** | **SS-bonds Cys residues** |
| --- | --- | --- | --- |
| Domain | 199–308 | 0.660 | - |
| Secondary | - | - | - |
| **Loop** | **199–219** | **0.592** | 207C,208C,212C, 216C |
| **Helix** | **220–223** | **0.683** | - |
| **Loop** | **224–229** | **0.683** | 224C,227C |
| Beta-I | 230–232 | 0.308 | - |
| **Beta-I** | **235–237** | **0.697** | 236C |
| Loop | 238–242 | 0.445 | 240C |
| **Beta-II** | **243–247** | **0.809** | - |
| **Loop** | **248–251** | **0.594** | - |
| **Beta-II** | **252–256** | **0.518** | - |
| Loop | 257–260 | 0.203 | - |
| Beta-III | 261–263 | 0.382 | - |
| Beta-III | 266–268 | 0.020 | 267C |
| Loop | 269–275 | 0.182 | 271C |
| **Beta-IV** | **276–278** | **0.579** | - |
| **Beta-IV** | **281–283** | **0.735** | 282C |
| Loop | 284–288 | 0.278 | 286C |
| Beta-V | 289–295 | 0.407 | - |
| Beta-V | 298–304 | 0.556 | 301C,304C |
| Loop | 305–308 | 0.884 | 308C |
| Beta-sheet | **I** | **0.521** | 236C |
| **II** | **0.619** | - |
| **III** | **0.558** | 267C |
| **IV** | **0.610** | 282C |
| V | 0.456 | 301C,304C |
| SS-bonds | 195–206 | Inter-domain | - |
| **207–216** | **0.671** | 208C,212C |
| **212–224** | **0.607** | 216C |
| 227–236 | 0.421 | - |
| **240–267** | **0.599** | - |
| **271–282** | **0.562** | - |
| 286–301 | 0.316 | - |
| **304–308** | **0.679** | - |
| Inter-SS | 199–207 | 0.286 | - |
| **216–224** | **0.626** | - |
| **224–227** | **0.811** | - |
| **236–240** | **0.543** | - |
| 267–271 | 0.218 | - |
| 282–286 | 0.224 | - |
| **301–304** | **0.605** | - |

**Table S3.** *RD* values for domain D3 of 1M6B, its individual secondary folds and all fragments bounded by Cys residues which form SS bonds. *RD* values in excess of 0.5 (indicating divergence from the idealized distribution) are listed in boldface.

| **1M6B-D3** | **Fragment** | ***RD*** | **SS-bonds** | **Ligand** |
| --- | --- | --- | --- | --- |
| Domain | 310–480 | 0.488 | - | - |
| Secondary | - | - | - | - |
| Beta-I | 310–314 | 0.422 | 312C |  |
| Loop | 315–327 | 0.379 | - | - |
| Helix | 328–333 | 0.400 | - | - |
| Beta-I | 336–339 | 0.383 | 335C | - |
| Beta-II | 342–344 | 0.273 | - | - |
| **Helix** | **345–351** | **0.649** | - | - |
| Loop | 352–360 | 0.214 | - | - |
| Helix | 361–371 | 0.249 | - | - |
| Beta-I | 372–376 | 0.317 | - | - |
| **Beta-II** | **377–381** | **0.545** | - | - |
| **Loop** | **382–389** | **0.635** | - | 385–389 |
| **Helix** | **390–394** | **0.573** | - | - |
| Beta-I | 397–400 | 0.445 | - | - |
| Loop | 401–407 | 0.411 | - | - |
| **Beta-II** | **408–415** | **0.608** | - | - |
| Loop | 416–428 | 0.340 | - | - |
| Beta-I | 429–431 | 0.354 | - | - |
| Beta-II | 434–439 | 0.224 | - | - |
| Loop | 440–449 | 0.436 | 444C | - |
| Helix | 450–455 | 0.381 | - | - |
| Loop | 456–461 | 0.409 | - | - |
| Beta-II | 462–466 | 0.400 | - | - |
| Loop | 467–469 | 0.390 | - | - |
| **Helix** | **470–475** | **0.528** | 474C | - |
| **Loop** | **476–480** | **0.790** | - | - |
| Beta-sheet | I | 0.388 | - | - |
| II | 0.463 | - | - |
| Helices | - | 0.460 | - | - |
| SS-bonds | 312–335 | 0.448 | - | - |
| 444–474 | 0.435 | - | - |
| Inter-SS | 335–444 | 0.497 | - | 385–389 |
| 474–481 | 0.460 | - | - |

**Table S4.** *RD* values for domain D4 of 1M6B, its individual secondary folds and all fragments bounded by Cys residues which form SS bonds. *RD* values in excess of 0.5 (indicating divergence from the idealized distribution) are listed in boldface.

| **1M6B-D4** | **Fragment** | ***RD*** | **SS-bonds** |
| --- | --- | --- | --- |
| **Domain** | **481–580** | **0.650** | - |
| **Loop** | **481–493** | **0.571** | 481C,485C,490C |
| **Helix** | **494–497** | **0.871** | - |
| **Loop** | **498–503** | **0.557** | 498C,501C |
| **Beta-I** | **504–506** | **0.559** | - |
| **Beta-I** | **509–511** | **0.687** | 510C |
| Loop | 512–521 | 0.352 | 514C |
| Beta-II | 522–526 | 0.307 | - |
| Beta-II | 529–533 | 0.434 | 530C,533C |
| **Loop** | **534–559** | **0.592** | 537C,544C,546C,557C |
| **Beta-III** | **560–562** | **0.693** | - |
| Beta-III | 565–567 | 0.242 | 566C |
| Loop | 568–580 | 0.482 | - |
| Beta-sheet | **I** | **0.598** | 510C |
| II | 0.346 | 530C,533C |
| III | 0.255 | 566C |
| SS-bonds | **481–490** | **0.627** | 485C |
| 485–498 | 0.415 | 490C |
| **501–510** | **0.506** | - |
| 514–530 | 0.336 | - |
| **533–546** | **0.578** | 537C,544C |
| 537–554 | 0.466 | 544C |
| 557–566 | 0.490 | - |
| Inter-SS | 490–498 | 0.497 | - |
| **498–501** | **0.531** | - |
| 510–514 | 0.402 | - |
| 530–533 | 0.497 | - |
| 537–546 | 0.354 | - |
| **546–554** | **0.523** | - |
| 566–580 | 0.482 | - |
